# Supplementary material for: Redirect Tropism of Fowl Adenovirus 4 Vector by Modifying Fiber2 with Variable Domain of Heavy-Chain Antibody
Source: MDPI journal article supplement (doi:10.3390/genes15040467), 2024-04-08
Supplement: s1 [file s1]

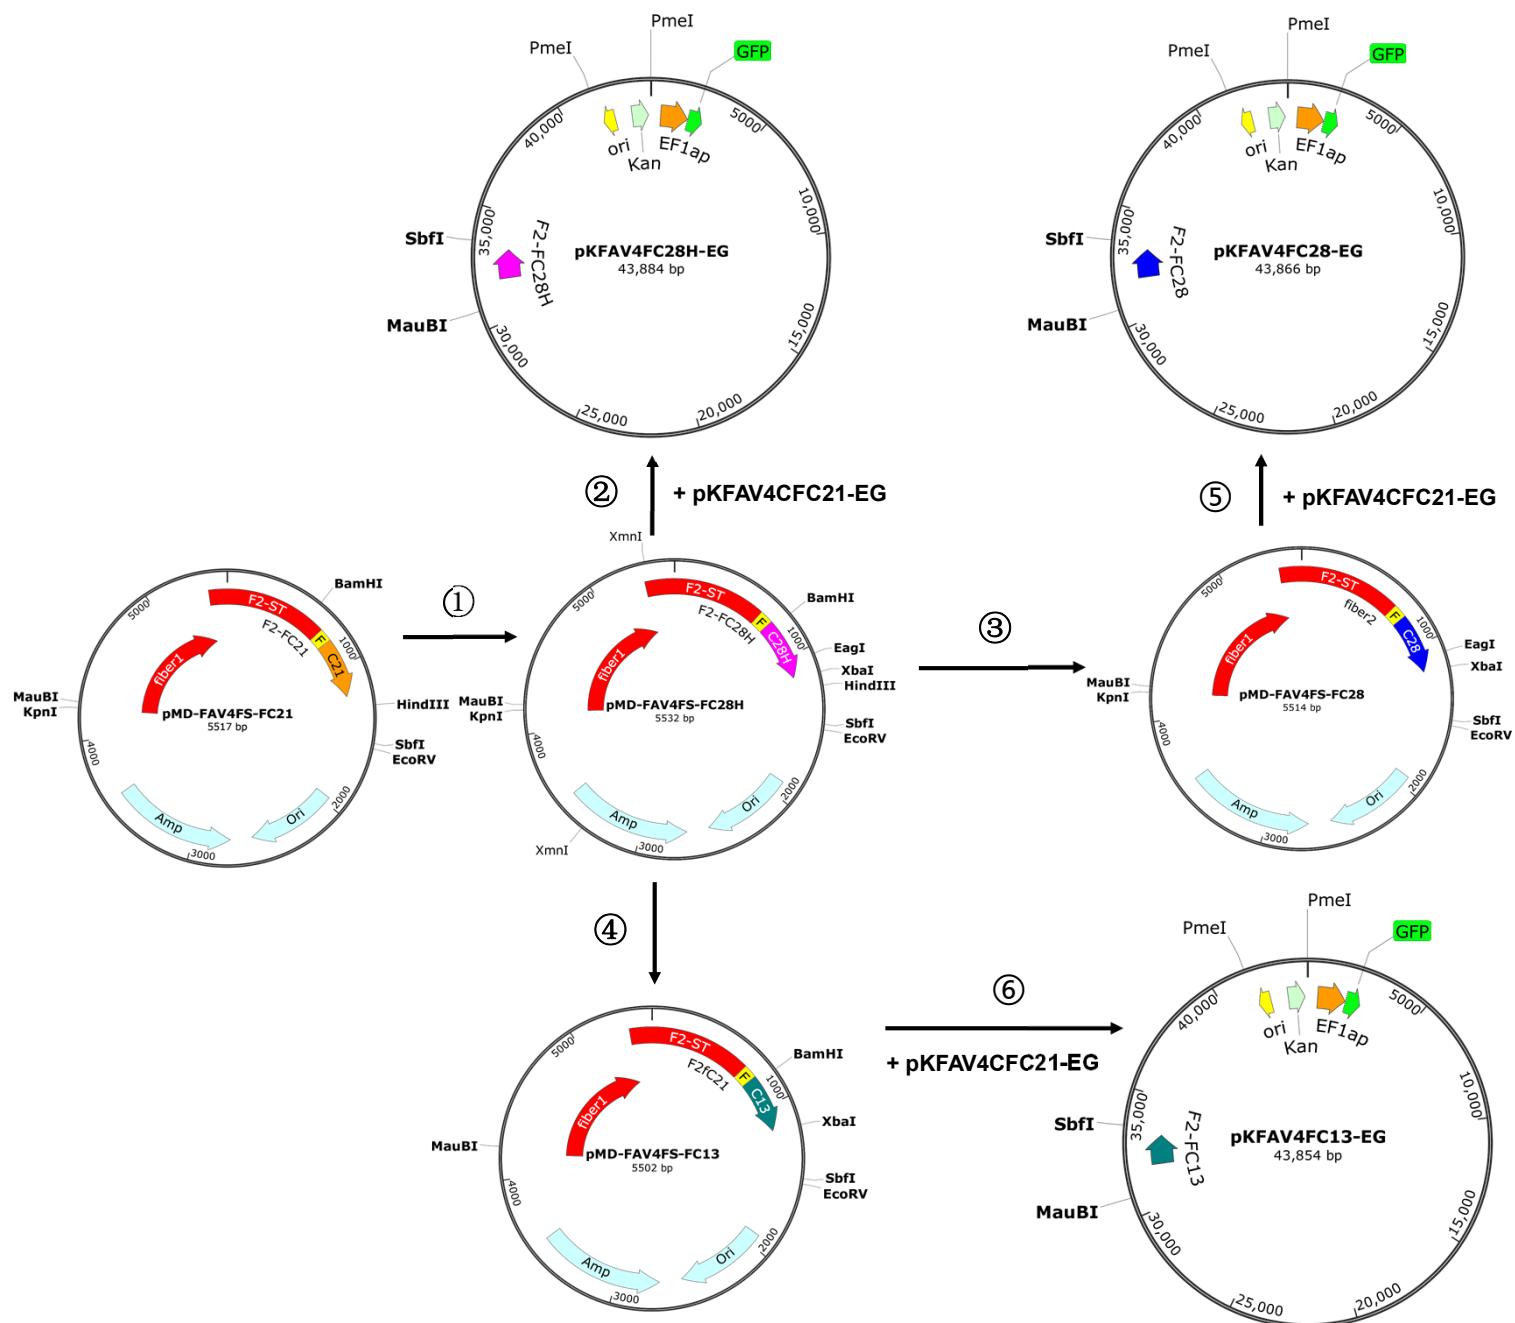

**Figure S1. Construction of VHH-incorporated FAdV-4 adenoviral plasmids.**

① BamHI/HindIII region in pMD-FAV4FS-FC21 was replaced with the synthesized C28H fragment by restriction-assembly to generate pMD-FAV4FS-FC28H. ② pMD-FAV4FS-FC28H was digested with KpnI/EcoRV, pKFAV4CFC21-EG was digested with MauBI/SbfI, the products were mixed and Gibson assembly was performed to generate pKFAV4FC28H-EG. ③ To further remove the 6×His tag in modified fiber2, the sequence between EagI/XbaI was mutated by overlap extension PCR, and modified plasmid of pMD-FAV4FS-FC28 was generated by restriction-assembly. ④ Fragment between BamHI/XbaI site in pMD-FAV4FS-FC21 was replaced with the synthesized C13 fragment by restriction-assembly to generate pMD-FAV4FS-FC13. ⑤ ⑥ Similarly, modified fiber2 could be transfer to pKFAV4CFC21-EG by restriction-assembly. C13, C21 and C28: VHHs against human CD16A; CMVp: CMV promoter; EF1ap: human EF1a promoter; Coiled coil: the 12th-13th coiled coil segments from fibrin of phage T4; F2-ST: FAdV-4 fiber2 shaft and tail.

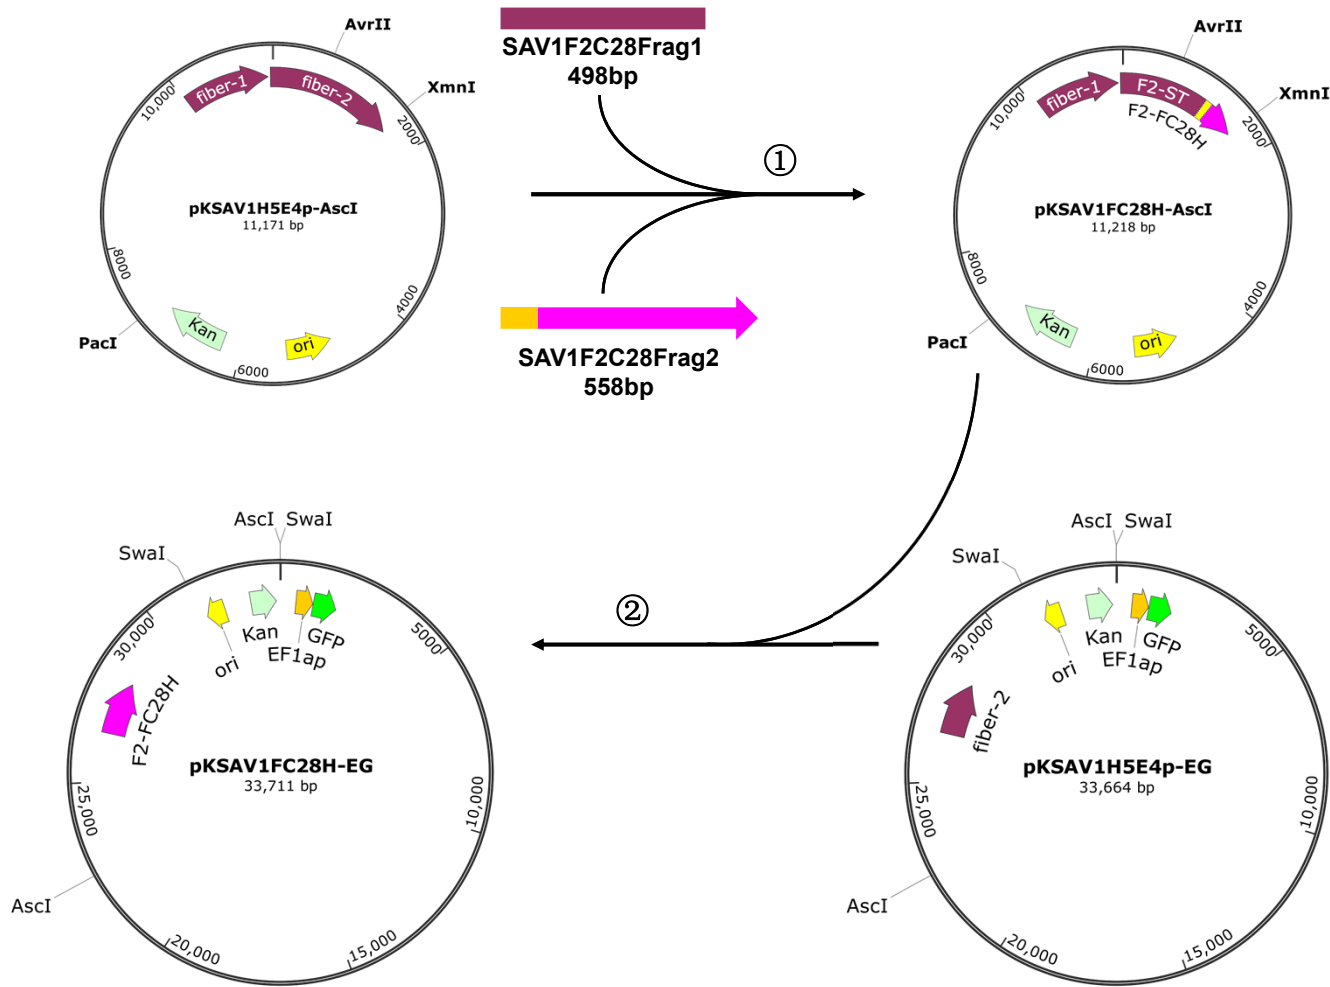

**Figure S2. Construction of pKSAV1FC28H-EG adenoviral plasmid.**

① For fiber modification in SAdV-1 vectors, overlap extension PCR was performed to fuse several PCR products together to generate a DNA fragment FC28H, which consists of SAV1F2C28Frag1, encoding partial SAdV-1 fiber2 shaft and tail, SAV1F2C28Frag2, encoding VHH of C28 against human CD16A, sequence surrounding AvrII site and sequence surrounding XmnI site in pKSAV1H5E4p-AscI plasmid. Fragment between AvrII/XmnI sites in pKSAV1H5E4p-AscI was replaced with the synthesized DNA C28H by restriction-assembly to generate pKSAV1FC28H-AscI.

② pKSAV1FC28H-AscI was digested with PacI, pKSAV1H5E4p-EG was digested with AscI, the products were mixed and Gibson assembly was performed to generate pKSAV1FC28H-EG. The primer sequences and related information for PCR was summarized in Table 1.

C28: VHH against human CD16A; EF1ap: human EF1a promoter; Coiled coil: the 12th-13th coiled coil segments from fibritin of phage T4; F2-ST: SAdV-1 fiber2 shaft and tail.

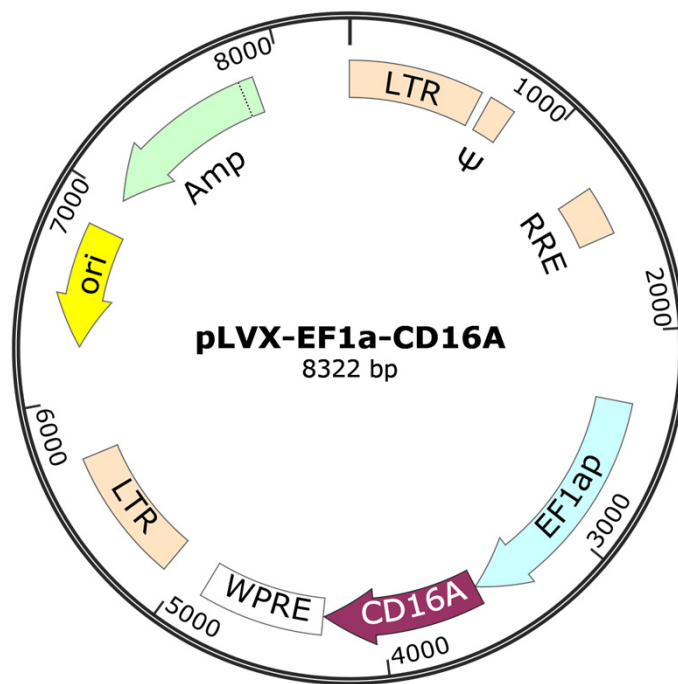

Figure S3. Plasmid map of lentivirus vector carrying human EF1a promoter-controlled CD16A gene.

(A)

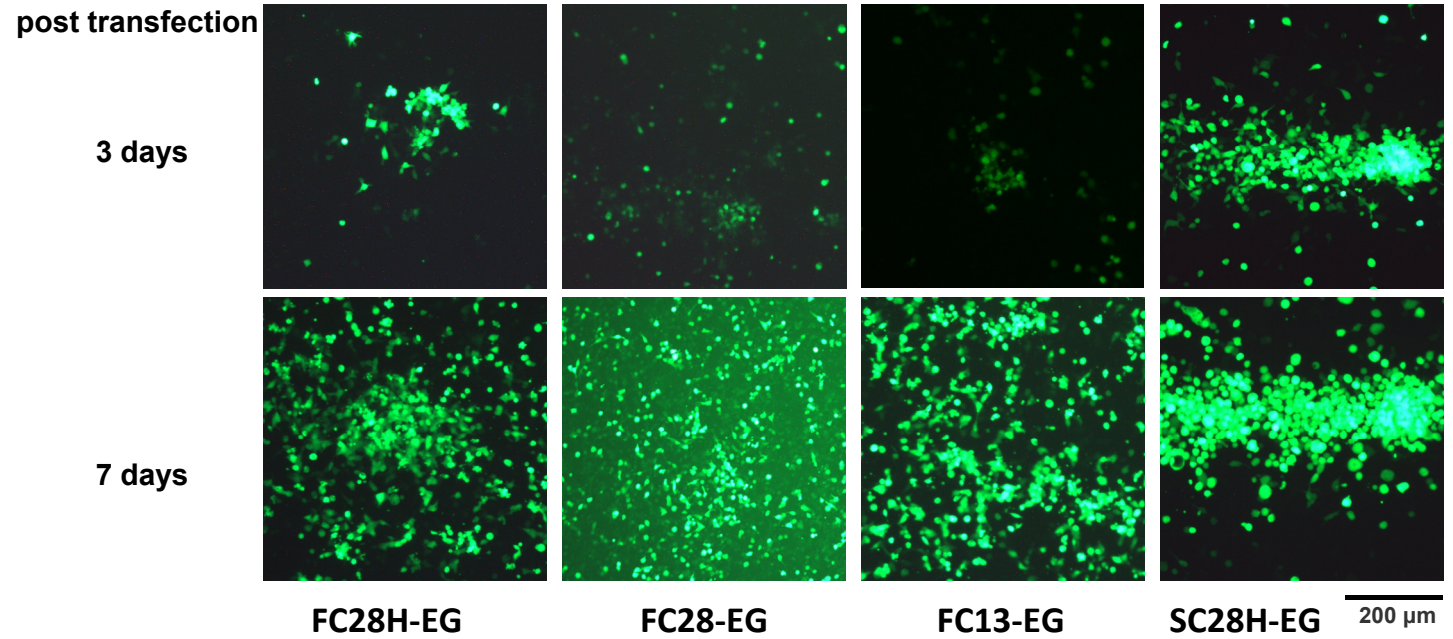

(B)

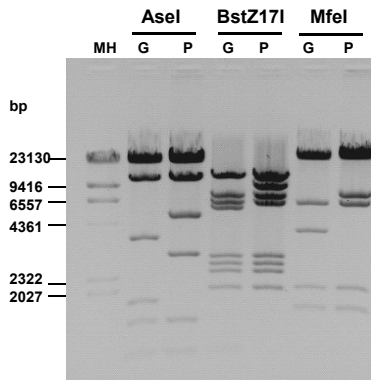

FC28H-EG

(C)

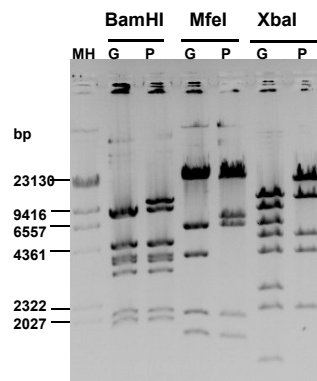

FC28-EG

(D)

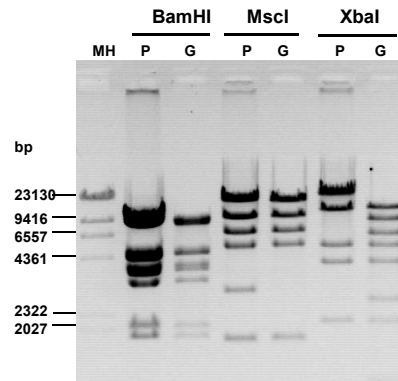

FC13-EG

(E)

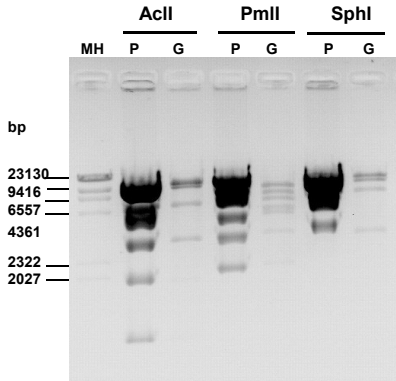

SFC28H-EG

**Figure S4. Rescue and identification of fiber-modified recombinant FAdV-4 viruses and SAdV-1 viruses.**

(A) Rescue of fiber-modified FAdV-4 virus in PmeI-linearized the vector of fiber-modified FAdV-4 transfected LMH cells; Foci formed by GFP-positive cells were observed under a fluorescence microscope 3- or 7-days post-transfection, suggesting successful virus rescue. Rescue of fiber-modified SAdV-1 virus in SmaI-linearized the vector of fiber-modified SAdV-1 transfected SE13 cells; Foci formed by GFP-positive cells were observed under a fluorescence microscope 3- or 7-days post-transfection, suggesting successful virus rescue.

(B,C,D,F) Virus identification. (B) The predicted molecular weights (bp) of digested fragments of FC28H-EG genome were 21,849 bp, 11251 bp, 3537 bp, 1722 bp, 1416 bp, 988 bp, 650 bp for AseI; and 12,141 bp, 6986 bp, 6118 bp, 5557 bp, 2755 bp, 2545 bp, 2337 bp, 1956 bp, 1018 bp for BstZ17I; and 27,094 bp, 5950 bp, 3824 bp, 1983 bp, 1630 bp, 705 bp, 227 bp for MfeI; The predicted molecular weights (bp) of digested fragments of FC28H-EG plasmid were 21,849 bp, 11251 bp, 4863 bp, 2867 bp, 1416 bp, 988 bp, 650 bp for AseI; and 12,141 bp, 9046 bp, 6986 bp, 6118 bp, 2755 bp, 2545 bp, 2337 bp, 1956 bp for BstZ17I; and 27,094 bp, 7000 bp, 5950 bp, 1983 bp, 1630 bp, 227 bp for MfeI; (C) The predicted molecular weights (bp) of digested fragments of FC28-EG genome were 8725 bp, 8153 bp, 4550 bp, 4548 bp, 3789 bp, 3627 bp, 3140 bp, 2039 bp, 1868 bp, 531 bp, 249 bp, 105 bp, 71 bp for BamHI; and 27,094 bp, 5932 bp, 3824 bp, 1983 bp, 1630 bp, 705 bp, 227 bp for MfeI; and 11,361 bp, 8302 bp, 6008 bp, 4882 bp, 3850 bp, 2558 bp, 2123 bp, 1290 bp, 994 bp, 27 bp for XbaI; The predicted molecular weights (bp) of digested fragments of FC28-EG plasmid were 10,873 bp, 8725 bp, 4550 bp, 4548 bp, 3789 bp, 3627 bp, 3140 bp, 2039 bp, 1868 bp, 531 bp, 249 bp, 105 bp, 71 bp for BamHI; and 27,094 bp, 7000 bp, 5932 bp, 1983 bp, 1630 bp, 705 bp, 227 bp for MfeI; and 20,953 bp, 11,037 bp, 4909 bp, 3850 bp, 2123 bp, 994 bp for XbaI; (D) The predicted molecular weights (bp) of digested fragments of FC13-EG genome were 8725 bp, 8153 bp, 4548 bp, 4538 bp, 3789 bp, 3627 bp, 3140 bp, 2039 bp, 1868 bp, 531 bp, 249 bp, 105 bp, 71 bp for BamHI; and 15,115 bp, 9317 bp, 6424 bp, 4910 bp, 1834 bp, 1827 bp, 1059 bp, 468 bp, 429 bp for MscI; and 11,361 bp, 8302 bp, 6008 bp, 4882 bp, 3838 bp, 2558 bp, 2123 bp, 1290 bp, 994 bp, 27 bp for XbaI; The predicted molecular weights (bp) of digested fragments of FC13-EG plasmid were 10,873 bp, 8725 bp, 4548 bp, 4538 bp, 3789 bp, 3627 bp, 3140 bp, 2039 bp, 1868 bp, 531 bp, 105 bp, 71 bp for BamHI; and 15,815 bp, 9317 bp, 6424 bp, 4910 bp, 2830 bp, 1834 bp, 1827 bp, 468 bp, 429 bp for MscI; and 20,953 bp, 11,037 bp, 4909 bp, 3838 bp, 2123 bp, 994 bp for XbaI; (E) The predicted molecular weights (bp) of digested fragments of SFC28H-EG genome were 10,390 bp, 8666 bp, 4643 bp, 4010 bp, 2805 bp, 1235 bp, 678 bp for AccII; and 7285 bp, 5795 bp, 4047 bp, 3758 bp, 2873 bp, 2873 bp, 2105 bp, 350 bp, 177 bp for PmlI; and 11,148 bp, 8748 bp, 5734 bp, 2809 bp, 2779 bp for SphI; The predicted molecular weights (bp) of digested fragments of SFC28H-EG plasmid were 10,390 bp, 8666 bp, 4643 bp, 4010 bp, 2805 bp, 1962 bp, 1235 bp for AccII; and 11,368 bp, 7285 bp, 5795 bp, 3758 bp, 2873 bp, 2105 bp, 350 bp, 177 bp for PmlI; and 11,148 bp, 8748 bp, 5734 bp, 4883 bp, 3198 bp for SphI.



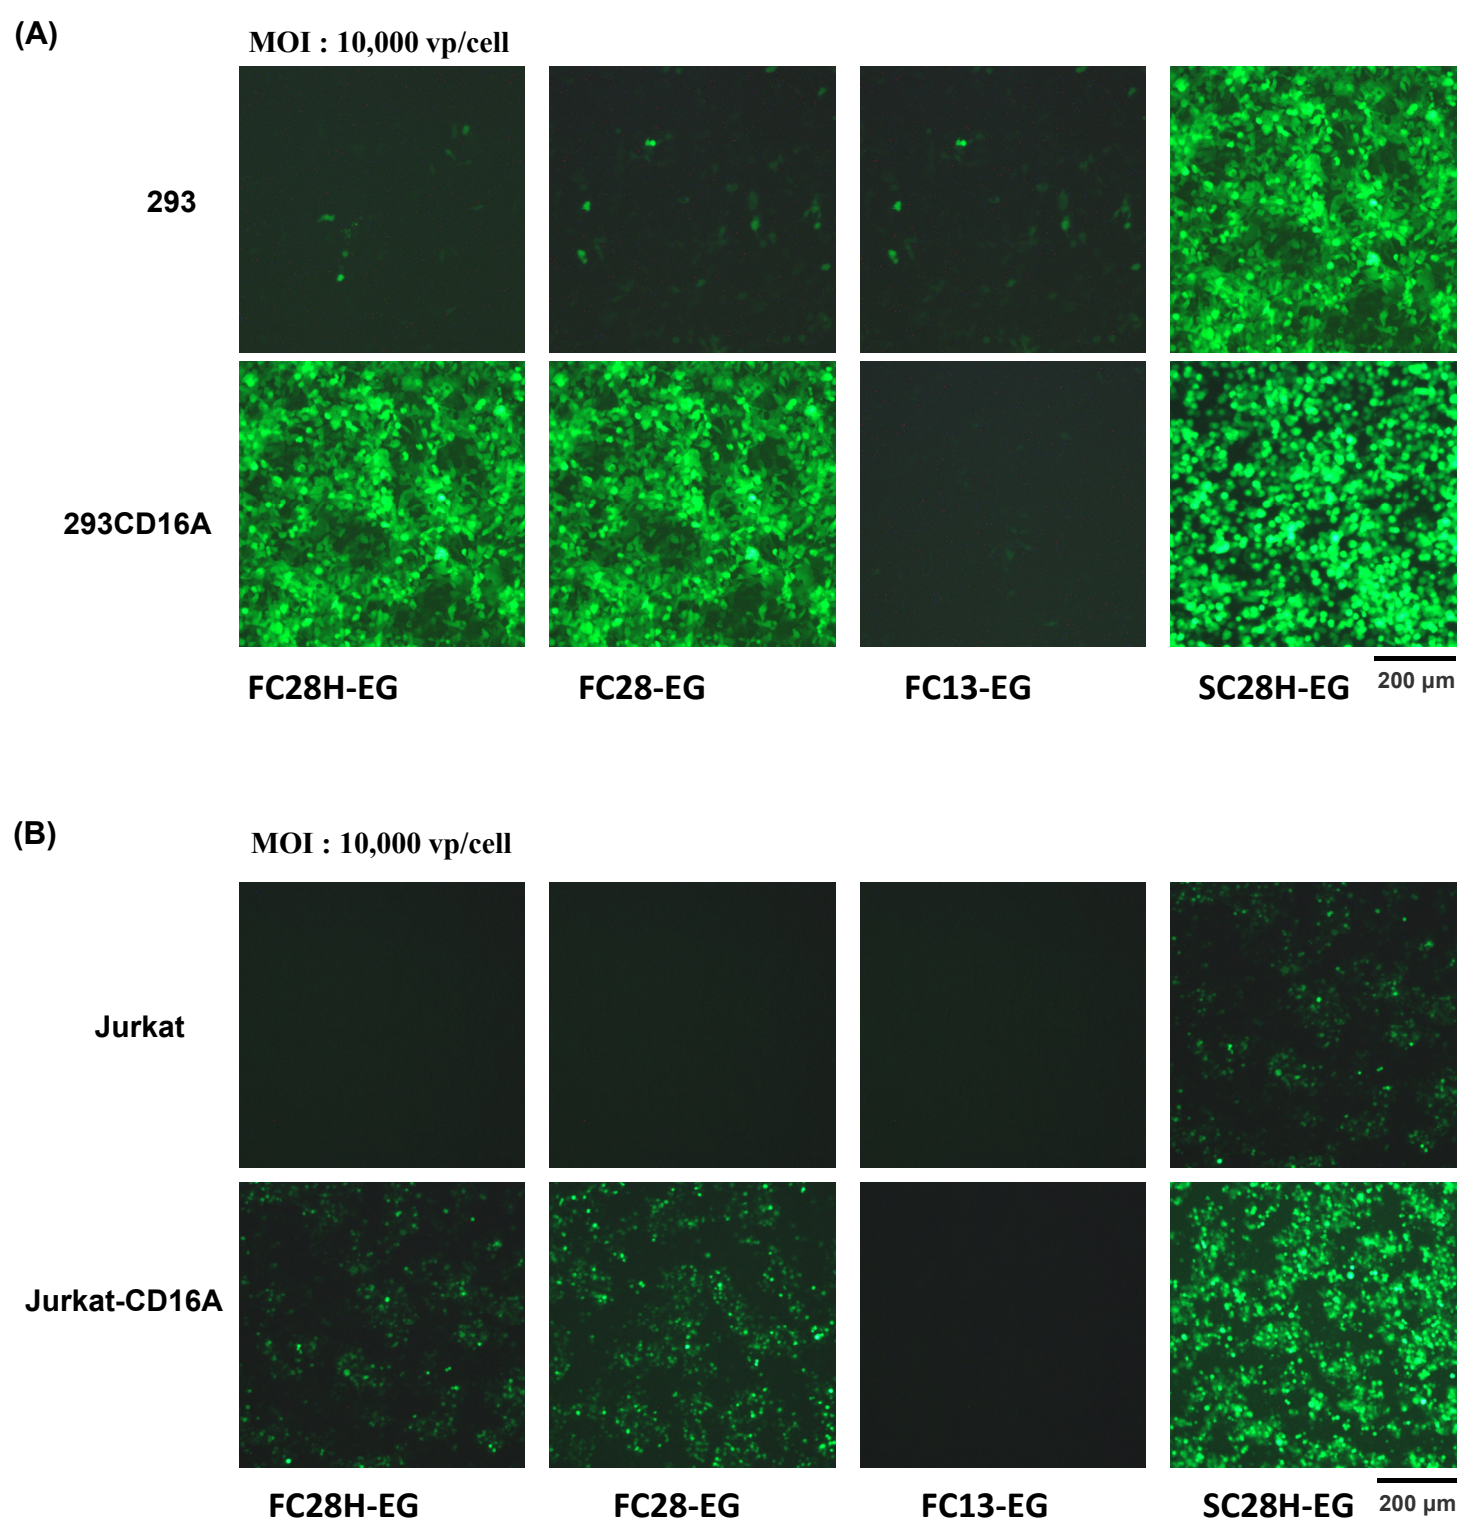

**Figure S5. Adenovirus transduction experiments.**

**(A)** 293 and 293CD16a cells were infected by the above viruses at MOI:10,000 vp/cell for 4 h. GFP expression was observed under a fluorescence microscope at 48 h post-infection.

**(B)** Jurkat and Jurkat-CD16a cells were infected by the above viruses at MOI:10,000 vp/cell for 4 h. GFP expression was observed under a fluorescence microscope at 48 h post-infection.

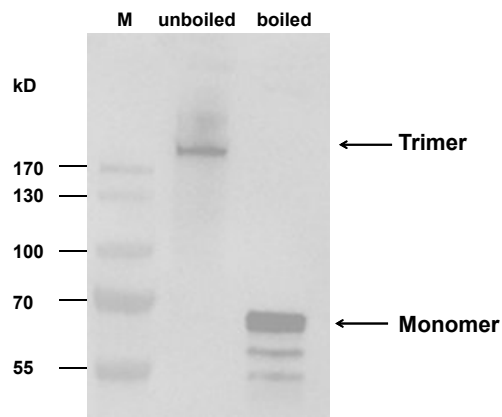

**Figure S6 Detection of VHH integrated fiber in SAdV1C28H-EG by Western blot.**

Equal amounts ( $2.5 \times 10^9$  vp) of purified SAdV1C28H-EG viruses were mixed with  $2 \times$  SDS loading buffer, incubated at room temperature (unboiled) or in boiling water (boiled) for 5 minutes, loaded in SDS-PAGE gel, and transferred to nitrocellulose membranes after electrophoresis. The fiber was detected by Western blot with anti-6 $\times$ His monoclonal antibody. M: protein marker. The predicted molecular weight of monomer fiber was 59.7 kD.
